# Supplementary material for: The Lilliput Effect in Colonial Organisms: Cheilostome Bryozoans at the Cretaceous–Paleogene Mass Extinction
Source: PLoS One. 2014 Feb 5;9(2):e87048. doi: 10.1371/journal.pone.0087048 (PMC3914794; doi:10.1371/journal.pone.0087048)
Supplement: Table S1 — Colony sizes for within-genus analysis. (XLS) [file pone.0087048.s001.xls]

## Sheet: S1 Colony size
Specimen	Formation	Bryozoan taxon	Substrate	Colony size (mm2)
9.3.10	Prairie Bluff Chalk	Balantiostoma nomas	Bivalve fragment	9.672
8.4.5	Prairie Bluff Chalk	Balantiostoma nomas	Bivalve fragment	10.177
8.4.20	Prairie Bluff Chalk	Balantiostoma nomas	Bivalve fragment	2.333
8.8.6	Prairie Bluff Chalk	Balantiostoma nomas	Bivalve fragment	1.334
8.8.7	Prairie Bluff Chalk	Balantiostoma nomas	Bivalve fragment	1.888
8.8.8	Prairie Bluff Chalk	Balantiostoma nomas	Bivalve fragment	4.902
8.12.14	Prairie Bluff Chalk	Balantiostoma nomas	Bivalve fragment	8.869
9.2.1	Prairie Bluff Chalk	Balantiostoma nomas	Bivalve fragment	11.243
9.2.24	Prairie Bluff Chalk	Balantiostoma nomas	Bivalve fragment	32.271
9.5.6	Prairie Bluff Chalk	Balantiostoma nomas	Bivalve fragment	3.223
9.5.19	Prairie Bluff Chalk	Balantiostoma nomas	Bivalve fragment	7.492
9.9.1	Prairie Bluff Chalk	Balantiostoma nomas	Bivalve fragment	7.185
9.9.2	Prairie Bluff Chalk	Balantiostoma nomas	Bivalve fragment	11.986
9.9.3	Prairie Bluff Chalk	Balantiostoma nomas	Bivalve fragment	2.207
9.9.4	Prairie Bluff Chalk	Balantiostoma nomas	Bivalve fragment	6.265
9.9.8	Prairie Bluff Chalk	Balantiostoma nomas	Bivalve fragment	1.333
9.14.1	Prairie Bluff Chalk	Balantiostoma nomas	Bivalve fragment	8.953
10.8.1	Prairie Bluff Chalk	Balantiostoma nomas	Exogyra	2.778
10.41.16	Prairie Bluff Chalk	Balantiostoma nomas	Exogyra	0.838
10.41.20	Prairie Bluff Chalk	Balantiostoma nomas	Exogyra	1.891
11.44.1	Prairie Bluff Chalk	Balantiostoma nomas	Pycnodonte	2.499
13.5.2	Prairie Bluff Chalk	Balantiostoma nomas	Bivalve fragment	23.886
13.5.4	Prairie Bluff Chalk	Balantiostoma nomas	Bivalve fragment	4.36
13.5.5	Prairie Bluff Chalk	Balantiostoma nomas	Bivalve fragment	10.611
13.5.6	Prairie Bluff Chalk	Balantiostoma nomas	Bivalve fragment	15.832
13.31.4	Prairie Bluff Chalk	Balantiostoma nomas	Bivalve fragment	11.488
13.36.2	Prairie Bluff Chalk	Balantiostoma nomas	Bivalve fragment	3.506
20.6.1	Clayton	Balantiostoma midwayanica	Pycnodonte pulaskiensis	21.586
20.6.3	Clayton	Balantiostoma midwayanica	Pycnodonte pulaskiensis	20.235
21.72.1	Clayton	Balantiostoma midwayanica	Pycnodonte pulaskiensis	16.676
21.73.1	Clayton	Balantiostoma midwayanica	Pycnodonte pulaskiensis	62.691
20.17.1	Clayton	Balantiostoma midwayanica	Pycnodonte pulaskiensis	6.439
20.77.1	Clayton	Balantiostoma midwayanica	Pycnodonte pulaskiensis	19.585
20.77.2	Clayton	Balantiostoma midwayanica	Pycnodonte pulaskiensis	9.868
C.1.1	Clayton	Balantiostoma midwayanica	Fragment unident.	3.782
C.2.1	Clayton	Balantiostoma midwayanica	Fragment unident.	11.357
C.4.1	Clayton	Balantiostoma midwayanica	Fragment unident.	12.13
C.4.3	Clayton	Balantiostoma midwayanica	Fragment unident.	0.573
C.5.7	Clayton	Balantiostoma midwayanica	Fragment unident.	6.916
C.5.8	Clayton	Balantiostoma midwayanica	Fragment unident.	0.43
C.5.9	Clayton	Balantiostoma midwayanica	Fragment unident.	1.899
C.5.10	Clayton	Balantiostoma midwayanica	Fragment unident.	6.9
C.5.11	Clayton	Balantiostoma midwayanica	Fragment unident.	1.744
C.5.12	Clayton	Balantiostoma midwayanica	Fragment unident.	3.193
C.5.13	Clayton	Balantiostoma midwayanica	Fragment unident.	1.293
C.5.14	Clayton	Balantiostoma midwayanica	Fragment unident.	9.487
C.5.17	Clayton	Balantiostoma midwayanica	Fragment unident.	4.325
C.6.1	Clayton	Balantiostoma midwayanica	Fragment unident.	9.932
C.7.1	Clayton	Balantiostoma midwayanica	Fragment unident.	5.828
C.7.2	Clayton	Balantiostoma midwayanica	Fragment unident.	13.871
C.7.3	Clayton	Balantiostoma midwayanica	Fragment unident.	0.225
C.9.3	Clayton	Balantiostoma midwayanica	Fragment unident.	6.187
C.11.1	Clayton	Balantiostoma midwayanica	Fragment unident.	1.855
C.12.1	Clayton	Balantiostoma midwayanica	Fragment unident.	12.069
C.14.1	Clayton	Balantiostoma midwayanica	Fragment unident.	12.53
C.15.1	Clayton	Balantiostoma midwayanica	Fragment unident.	1.367
C.15.2	Clayton	Balantiostoma midwayanica	Fragment unident.	0.492
C.18.2	Clayton	Balantiostoma midwayanica	Fragment unident.	7.697
C.23.1	Clayton	Balantiostoma midwayanica	Fragment unident.	6.517
C.23.2	Clayton	Balantiostoma midwayanica	Fragment unident.	2.479
C.26.1	Clayton	Balantiostoma midwayanica	Fragment unident.	0.485
C.36.1	Clayton	Balantiostoma midwayanica	Fragment unident.	1.937
C.38.1	Clayton	Balantiostoma midwayanica	Fragment unident.	5.189
C.44.1	Clayton	Balantiostoma midwayanica	Fragment unident.	1.144
C.53.1	Clayton	Balantiostoma midwayanica	Fragment unident.	4.837
C.54.1	Clayton	Balantiostoma midwayanica	Fragment unident.	4.752
C.60.1	Clayton	Balantiostoma midwayanica	Fragment unident.	3.449
C.63.1	Clayton	Balantiostoma midwayanica	Fragment unident.	7.784
C.66.1	Clayton	Balantiostoma midwayanica	Fragment unident.	0.7
C.47.2	Clayton	Balantiostoma midwayanica	Fragment unident.	11.479
C.48.1	Clayton	Balantiostoma midwayanica	Fragment unident.	7.419
C.48.2	Clayton	Balantiostoma midwayanica	Fragment unident.	1.924
20.1274	Clayton	Balantiostoma midwayanica	Pycnodonte pulaskiensis	18.877
20.a.1	Clayton	Balantiostoma midwayanica	Pycnodonte pulaskiensis	12.875
21.13.2	Clayton	Balantiostoma midwayanica	Pycnodonte pulaskiensis	1.176
21.13.3	Clayton	Balantiostoma midwayanica	Pycnodonte pulaskiensis	7.599
21.17.1	Clayton	Balantiostoma midwayanica	Pycnodonte pulaskiensis	36.346
21.91.2	Clayton	Balantiostoma midwayanica	Pycnodonte pulaskiensis	7.177
21.94.2	Clayton	Balantiostoma midwayanica	Pycnodonte pulaskiensis	5.339
21.94.3	Clayton	Balantiostoma midwayanica	Pycnodonte pulaskiensis	1.296
21.94.4	Clayton	Balantiostoma midwayanica	Pycnodonte pulaskiensis	11.942
9.5.12	Prairie Bluff Chalk	Tricephalopora larwoodi	Bivalve fragment	6.594
9.5.14	Prairie Bluff Chalk	Tricephalopora larwoodi	Bivalve fragment	35.975
9.5.15	Prairie Bluff Chalk	Tricephalopora larwoodi	Bivalve fragment	5.387
8.3.1	Prairie Bluff Chalk	Tricephalopora larwoodi	Bivalve fragment	6.046
8.11.8	Prairie Bluff Chalk	Tricephalopora larwoodi	Exogyra	37.779
8.11.16	Prairie Bluff Chalk	Tricephalopora larwoodi	Exogyra	3.252
8.11.18	Prairie Bluff Chalk	Tricephalopora larwoodi	Exogyra	26.694
8.11.31	Prairie Bluff Chalk	Tricephalopora larwoodi	Exogyra	3.618
8.11.32	Prairie Bluff Chalk	Tricephalopora larwoodi	Exogyra	3.352
8.12.13	Prairie Bluff Chalk	Tricephalopora larwoodi	Bivalve fragment	0.722
9.5.7	Prairie Bluff Chalk	Tricephalopora larwoodi	Bivalve fragment	9.79
9.8.2	Prairie Bluff Chalk	Tricephalopora larwoodi	Bivalve fragment	4.502
9.8.3	Prairie Bluff Chalk	Tricephalopora larwoodi	Bivalve fragment	2.545
9.8.4	Prairie Bluff Chalk	Tricephalopora larwoodi	Bivalve fragment	13.132
9.8.5	Prairie Bluff Chalk	Tricephalopora larwoodi	Bivalve fragment	18.529
9.9.6	Prairie Bluff Chalk	Tricephalopora larwoodi	Bivalve fragment	38.262
9.11.3	Prairie Bluff Chalk	Tricephalopora larwoodi	Bivalve fragment	29.319
9.11.6	Prairie Bluff Chalk	Tricephalopora larwoodi	Bivalve fragment	6.728
9.11.7	Prairie Bluff Chalk	Tricephalopora larwoodi	Bivalve fragment	1.723
9.11.22	Prairie Bluff Chalk	Tricephalopora larwoodi	Bivalve fragment	2.117
9.35.1	Prairie Bluff Chalk	Tricephalopora larwoodi	Bivalve fragment	7.239
9.35.2	Prairie Bluff Chalk	Tricephalopora larwoodi	Bivalve fragment	5.794
9.43.2	Prairie Bluff Chalk	Tricephalopora larwoodi	Bivalve fragment	1.427
9.45.1	Prairie Bluff Chalk	Tricephalopora larwoodi	Exogyra fragment	115.889
10.8.2	Prairie Bluff Chalk	Tricephalopora larwoodi	Exogyra	0.821
10.19.1	Prairie Bluff Chalk	Tricephalopora larwoodi	Bivalve fragment	4.985
11.44.3	Prairie Bluff Chalk	Tricephalopora larwoodi	Pycnodonte	2.07
11.44.7	Prairie Bluff Chalk	Tricephalopora larwoodi	Pycnodonte	26.04
13.36.1	Prairie Bluff Chalk	Tricephalopora larwoodi	Bivalve fragment	19.869
13.67.1	Prairie Bluff Chalk	Tricephalopora larwoodi	Bivalve fragment	41.717
8.11.28	Prairie Bluff Chalk	Tricephalopora larwoodi	Exogyra	43.59
8.11.33	Prairie Bluff Chalk	Tricephalopora larwoodi	Exogyra	5.963
8.11.40	Prairie Bluff Chalk	Tricephalopora larwoodi	Exogyra	3.766
8.12.1	Prairie Bluff Chalk	Tricephalopora larwoodi	Bivalve fragment	2.918
11.15.12	Prairie Bluff Chalk	Tricephalopora larwoodi	Pycnodonte	90.133
11.16.15	Prairie Bluff Chalk	Tricephalopora larwoodi	Pycnodonte	0.786
11.16.64	Prairie Bluff Chalk	Tricephalopora larwoodi	Pycnodonte	9.037
11.16.67	Prairie Bluff Chalk	Tricephalopora larwoodi	Pycnodonte	22.944
11.16.68	Prairie Bluff Chalk	Tricephalopora larwoodi	Pycnodonte	49.665
11.16.69	Prairie Bluff Chalk	Tricephalopora larwoodi	Pycnodonte	19.881
11.19.1	Prairie Bluff Chalk	Tricephalopora larwoodi	Exogyra	50.425
11.19.3	Prairie Bluff Chalk	Tricephalopora larwoodi	Exogyra	0.732
11.19.4	Prairie Bluff Chalk	Tricephalopora larwoodi	Exogyra	18.533
11.19.5	Prairie Bluff Chalk	Tricephalopora larwoodi	Exogyra	1.603
11.19.6	Prairie Bluff Chalk	Tricephalopora larwoodi	Exogyra	2.319
20.23.1	Clayton	Tricephalopora levigatum	Pycnodonte pulakiensis	16.231
20.b.1	Clayton	Tricephalopora levigatum	Pycnodonte pulakiensis	5.729
20.b.2	Clayton	Tricephalopora levigatum	Pycnodonte pulakiensis	1.743
20.c	Clayton	Tricephalopora levigatum	Pycnodonte pulakiensis	23.706
20.d	Clayton	Tricephalopora levigatum	Pycnodonte pulakiensis	26.135
20.e	Clayton	Tricephalopora levigatum	Pycnodonte pulakiensis	53.482
20.f.1	Clayton	Tricephalopora levigatum	Pycnodonte pulakiensis	12.107
20.f.2	Clayton	Tricephalopora levigatum	Pycnodonte pulakiensis	8.096
C.4.2	Clayton	Tricephalopora levigatum	Pycnodonte pulakiensis	2.484
C.9.2	Clayton	Tricephalopora levigatum	Pycnodonte pulakiensis	4.14
SK2H10.2	Hojerup	Pliophloea subcornuta	Galerites	2.877
SK1H1.2	Hojerup	Pliophloea subcornuta	Echinocorys scutata	6.849
SK1H1.3	Hojerup	Pliophloea subcornuta	Echinocorys scutata	2.895
SK1H3.1	Hojerup	Pliophloea subcornuta	Echinocorys scutata	24.357
SK1H3.2	Hojerup	Pliophloea subcornuta	Echinocorys scutata	55.74
SK1H3.14	Hojerup	Pliophloea subcornuta	Echinocorys scutata	99.593
SK1H3.22	Hojerup	Pliophloea subcornuta	Echinocorys scutata	6.85
SK1H3.23	Hojerup	Pliophloea subcornuta	Echinocorys scutata	5.083
SK1H3.24	Hojerup	Pliophloea subcornuta	Echinocorys scutata	17.714
SK1H3.25	Hojerup	Pliophloea subcornuta	Echinocorys scutata	85.459
SK1H3.52	Hojerup	Pliophloea subcornuta	Echinocorys scutata	34.489
SK1H3.53	Hojerup	Pliophloea subcornuta	Echinocorys scutata	97.624
SK1H3.57	Hojerup	Pliophloea subcornuta	Echinocorys scutata	0.273
SK1H3.61	Hojerup	Pliophloea subcornuta	Echinocorys scutata	75.379
SK1H3.63	Hojerup	Pliophloea subcornuta	Echinocorys scutata	68.91
SK1H3.64	Hojerup	Pliophloea subcornuta	Echinocorys scutata	23.679
SK1H3.66	Hojerup	Pliophloea subcornuta	Echinocorys scutata	3.389
SK1H3.74	Hojerup	Pliophloea subcornuta	Echinocorys scutata	9.704
SK1H4.23	Hojerup	Pliophloea subcornuta	Echinocorys scutata	7.1
SK1H4.1	Hojerup	Pliophloea subcornuta	Echinocorys scutata	72.222
SK1H4.2	Hojerup	Pliophloea subcornuta	Echinocorys scutata	22.262
SK1H4.3	Hojerup	Pliophloea subcornuta	Echinocorys scutata	24.945
SK1H4.4	Hojerup	Pliophloea subcornuta	Echinocorys scutata	178.695
SK1H4.5	Hojerup	Pliophloea subcornuta	Echinocorys scutata	5.119
SK1H4.4	Hojerup	Pliophloea subcornuta	Echinocorys scutata	92.465
SK1H4.5	Hojerup	Pliophloea subcornuta	Echinocorys scutata	35.385
SK1H7.4	Hojerup	Pliophloea subcornuta	Galerites	3.52
SK1H8.1	Hojerup	Pliophloea subcornuta	Galerites	4.0529
SK1H8.6	Hojerup	Pliophloea subcornuta	Galerites	151.787
SK1H10.3	Hojerup	Pliophloea subcornuta	Galerites	11.177
SK1H10.8	Hojerup	Pliophloea subcornuta	Galerites	12.169
SK1H10.13	Hojerup	Pliophloea subcornuta	Galerites	0.662
SK1H12.5	Hojerup	Pliophloea subcornuta	Galerites	33.514
SK1H12.22	Hojerup	Pliophloea subcornuta	Galerites	20.937
SK1H13.2	Hojerup	Pliophloea subcornuta	Galerites	104.997
SK1H14.9	Hojerup	Pliophloea subcornuta	Galerites	2.592
SK1H17.1	Hojerup	Pliophloea subcornuta	Galerites	56.03
SK1H17.5	Hojerup	Pliophloea subcornuta	Galerites	6.743
SK1H21.1	Hojerup	Pliophloea subcornuta	Galerites	4.025
SK2H1.1	Hojerup	Pliophloea subcornuta	Galerites	168.86
SK2H2.2	Hojerup	Pliophloea subcornuta	Galerites	14.407
SK2H3.3	Hojerup	Pliophloea subcornuta	Galerites	61.669
SK2H3.4	Hojerup	Pliophloea subcornuta	Galerites	5.735
SK2H5.6	Hojerup	Pliophloea subcornuta	Galerites	7.127
SK2H5.7	Hojerup	Pliophloea subcornuta	Galerites	16.325
SK2H5.9	Hojerup	Pliophloea subcornuta	Galerites	179.131
SK2H5.1	Hojerup	Pliophloea subcornuta	Galerites	3.879
SK2H12.12	Hojerup	Pliophloea subcornuta	Galerites	12.18
SK2H26.12	Hojerup	Pliophloea subcornuta	Echinocorys fragment	9.259
SK2H27.4	Hojerup	Pliophloea subcornuta	Echinocorys scutata	9.957
SK2H27.24	Hojerup	Pliophloea subcornuta	Echinocorys scutata	1.363
SK2H29.17	Hojerup	Pliophloea subcornuta	Echinocorys scutata	30.528
SK2H30.12	Hojerup	Pliophloea subcornuta	Echinocorys scutata	9.478
SK2H30.13	Hojerup	Pliophloea subcornuta	Echinocorys scutata	52.963
SK2H30.17	Hojerup	Pliophloea subcornuta	Echinocorys scutata	63.237
SK2H30.23	Hojerup	Pliophloea subcornuta	Echinocorys scutata	1.723
SK2H30.27	Hojerup	Pliophloea subcornuta	Echinocorys scutata	5.23
SK2H30.34	Hojerup	Pliophloea subcornuta	Echinocorys scutata	29.718
SK2H30.36	Hojerup	Pliophloea subcornuta	Echinocorys scutata	160.211
SK2H30.39	Hojerup	Pliophloea subcornuta	Echinocorys scutata	1.848
SK2H33.2	Hojerup	Pliophloea subcornuta	Echinocorys scutata	22.717
SK2H33.6	Hojerup	Pliophloea subcornuta	Echinocorys scutata	166.027
SK2H33.8	Hojerup	Pliophloea subcornuta	Echinocorys scutata	1.764
SK2H33.12	Hojerup	Pliophloea subcornuta	Echinocorys scutata	524.067
SK2H35a.1	Hojerup	Pliophloea subcornuta	Bivalve fragment	1.217
SK2H36b.1	Hojerup	Pliophloea subcornuta	Echinoid fragment	15.96
SK2H37a.1	Hojerup	Pliophloea subcornuta	Echinoid fragment	14.757
SK4H2.1	Hojerup	Pliophloea subcornuta	Galerites	5.147
SK4H4.13	Hojerup	Pliophloea subcornuta	Echinocorys scutata	22.272
SK4H4.23	Hojerup	Pliophloea subcornuta	Echinocorys scutata	30.038
SK4H10.3	Hojerup	Pliophloea subcornuta	Echinocorys fragment	12.138
SK4H10.7	Hojerup	Pliophloea subcornuta	Echinocorys fragment	18.319
SK3K2.1	Korsnaeb	Pliophloea subcornuta	Bivalve fragment	62.25
SK3K2.5	Korsnaeb	Pliophloea subcornuta	Bivalve fragment	43.034
SK3K2.7	Korsnaeb	Pliophloea subcornuta	Bivalve fragment	1.694
SK3K3.7	Korsnaeb	Pliophloea subcornuta	Pycnodonte	30.272
SK3K3.8	Korsnaeb	Pliophloea subcornuta	Pycnodonte	1.254
SK3K3.9	Korsnaeb	Pliophloea subcornuta	Pycnodonte	20.564
SK4K1.1	Korsnaeb	Pliophloea subcornuta	Pycnodonte	29.734
SK4K2.1	Korsnaeb	Pliophloea subcornuta	Pycnodonte	79.333
SK4K2.2	Korsnaeb	Pliophloea subcornuta	Pycnodonte	54.394
SK4K5.4	Korsnaeb	Pliophloea subcornuta	Fragment unident.	1.75
SK4K5.7	Korsnaeb	Pliophloea subcornuta	Fragment unident.	3.489
SK4K7.2	Korsnaeb	Pliophloea subcornuta	Echinocorys fragment	7.497
SK4K7.4	Korsnaeb	Pliophloea subcornuta	Echinocorys fragment	4.57
SK4K7.6	Korsnaeb	Pliophloea subcornuta	Echinocorys fragment	3.401
SK4K7.7	Korsnaeb	Pliophloea subcornuta	Echinocorys fragment	20.136
SK4K7.1	Korsnaeb	Pliophloea subcornuta	Echinocorys fragment	5.25
SK4K7.11	Korsnaeb	Pliophloea subcornuta	Echinocorys fragment	15.031
SK4K7.16	Korsnaeb	Pliophloea subcornuta	Echinocorys fragment	18.457
SK4K8.5	Korsnaeb	Pliophloea subcornuta	Pycnodonte	14.098
SK5K3.2	Korsnaeb	Pliophloea subcornuta	Echinocoyrs scutata	8.821
SK5K3.3	Korsnaeb	Pliophloea subcornuta	Echinocoyrs scutata	31.952
SK5K3.5	Korsnaeb	Pliophloea subcornuta	Echinocoyrs scutata	5.781
SK5K3.8	Korsnaeb	Pliophloea subcornuta	Echinocoyrs scutata	2.356
SK5K3.12	Korsnaeb	Pliophloea subcornuta	Echinocoyrs scutata	8.411
SK6K2.1	Korsnaeb	Pliophloea subcornuta	Pycnodonte	7.177
SK6K2.3	Korsnaeb	Pliophloea subcornuta	Pycnodonte	8.728
SK6K2.5	Korsnaeb	Pliophloea subcornuta	Pycnodonte	1.255
SK6K6.21	Korsnaeb	Pliophloea subcornuta	Echinocorys scutata	15.089
SK6K6.25	Korsnaeb	Pliophloea subcornuta	Echinocorys scutata	22.368
SK6K6.26	Korsnaeb	Pliophloea subcornuta	Echinocorys scutata	2.663
SK6K6.32	Korsnaeb	Pliophloea subcornuta	Echinocorys scutata	210.859
SK6K6.33	Korsnaeb	Pliophloea subcornuta	Echinocorys scutata	26.131
SK6K6.34	Korsnaeb	Pliophloea subcornuta	Echinocorys scutata	91.555
SK6K6.35	Korsnaeb	Pliophloea subcornuta	Echinocorys scutata	83.69
SK6K6.36	Korsnaeb	Pliophloea subcornuta	Echinocorys scutata	11.665
SK6K6.37	Korsnaeb	Pliophloea subcornuta	Echinocorys scutata	55.179
SK6K6.42	Korsnaeb	Pliophloea subcornuta	Echinocorys scutata	5.547
SK6K6.48	Korsnaeb	Pliophloea subcornuta	Echinocorys scutata	4.743
SK6K7.4	Korsnaeb	Pliophloea subcornuta	Echinocorys scutata	30.996
SK6K7.6	Korsnaeb	Pliophloea subcornuta	Echinocorys scutata	32.18
SK6K7.7	Korsnaeb	Pliophloea subcornuta	Echinocorys scutata	76.05
SK6K7.12	Korsnaeb	Pliophloea subcornuta	Echinocorys scutata	127.186
SK6K7.22	Korsnaeb	Pliophloea subcornuta	Echinocorys scutata	61.732
SK6K7.25	Korsnaeb	Pliophloea subcornuta	Echinocorys scutata	259.59
SK6K7.29	Korsnaeb	Pliophloea subcornuta	Echinocorys scutata	98.989
SK6K7.33	Korsnaeb	Pliophloea subcornuta	Echinocorys scutata	102.053
SK6K7.34	Korsnaeb	Pliophloea subcornuta	Echinocorys scutata	34.508
SK6K7.37	Korsnaeb	Pliophloea subcornuta	Echinocorys scutata	160.018
SK6K9.1	Korsnaeb	Pliophloea subcornuta	Pycnodonte	52.258
SK6K9.4	Korsnaeb	Pliophloea subcornuta	Pycnodonte	36.735
SK6K9.6	Korsnaeb	Pliophloea subcornuta	Pycnodonte	42.545
SK6K9.9	Korsnaeb	Pliophloea subcornuta	Pycnodonte	6.254
SK6K9.11	Korsnaeb	Pliophloea subcornuta	Pycnodonte	18.107
SK6K13.1	Korsnaeb	Pliophloea subcornuta	Echinocorys fragment	13.347
SK6K13.5	Korsnaeb	Pliophloea subcornuta	Echinocorys fragment	6.998
SK6K19.1	Korsnaeb	Pliophloea subcornuta	Echinocoyrs scutata	8.715
SK6K20.1	Korsnaeb	Pliophloea subcornuta	Echinocoyrs scutata	6.947
SK6K20.11	Korsnaeb	Pliophloea subcornuta	Echinocoyrs scutata	71.234
SK6K20.25	Korsnaeb	Pliophloea subcornuta	Echinocoyrs scutata	28.876
SK6K20.31	Korsnaeb	Pliophloea subcornuta	Echinocoyrs scutata	44.821
SK6K20.34	Korsnaeb	Pliophloea subcornuta	Echinocoyrs scutata	14.695
SK1H3.28	Hojerup	Stichomicropora	Echinocorys scutata	207.78
SK1H4.07	Hojerup	Stichomicropora	Echinocorys scutata	51.209
SK1H4.13	Hojerup	Stichomicropora	Echinocorys scutata	41.088
SK1H4.29	Hojerup	Stichomicropora	Echinocorys scutata	418.571
SK1H4.42	Hojerup	Stichomicropora	Echinocorys scutata	108.972
SK2H5.11	Hojerup	Stichomicropora	Galerites	1.983
SK2H15.02	Hojerup	Stichomicropora	Galerites	200.96
SK2H15.03	Hojerup	Stichomicropora	Galerites	135.455
SK2H29.02	Hojerup	Stichomicropora	Echinocorys scutata	139.971
SK2H29.19	Hojerup	Stichomicropora	Echinocorys scutata	24.339
SK2H29.2	Hojerup	Stichomicropora	Echinocorys scutata	23.72
SK2H29.21	Hojerup	Stichomicropora	Echinocorys scutata	72.896
SK2H29.22	Hojerup	Stichomicropora	Echinocorys scutata	27.43
SK2H29.27	Hojerup	Stichomicropora	Echinocorys scutata	65.724
SK2H29.34	Hojerup	Stichomicropora	Echinocorys scutata	33.762
SK2H30.15	Hojerup	Stichomicropora	Echinocorys scutata	7.722
SK2H30.21	Hojerup	Stichomicropora	Echinocorys scutata	48.094
SK2H30.25	Hojerup	Stichomicropora	Echinocorys scutata	18.133
SK2H30.3	Hojerup	Stichomicropora	Echinocorys scutata	5.246
SK2H30.4	Hojerup	Stichomicropora	Echinocorys scutata	12.103
SK2H31.09	Hojerup	Stichomicropora	Echinocorys scutata	37.25
SK2H31.19	Hojerup	Stichomicropora	Echinocorys scutata	30.048
SK2H32a.06	Hojerup	Stichomicropora	Echinocorys scutata	65.376
SK2H32a.07	Hojerup	Stichomicropora	Echinocorys scutata	2.2
SK2H32a.08	Hojerup	Stichomicropora	Echinocorys scutata	11.022
SK2H32b.03	Hojerup	Stichomicropora	Echinocorys scutata	8.998
SK2H32b.04	Hojerup	Stichomicropora	Echinocorys scutata	5.147
SK2H36a.01	Hojerup	Stichomicropora	Echinoid fragment	14.755
SK2H36b.02	Hojerup	Stichomicropora	Echinoid fragment	28.57
SK2H37a.03	Hojerup	Stichomicropora	Echinoid fragment	24.677
SK4H3.11	Hojerup	Stichomicropora	Echinocorys scutata	12.66
SK4H3.29	Hojerup	Stichomicropora	Echinocorys scutata	23.999
SK4H3.3	Hojerup	Stichomicropora	Echinocorys scutata	29.934
SK4H3.31	Hojerup	Stichomicropora	Echinocorys scutata	42.796
SK4H4.05	Hojerup	Stichomicropora	Echinocorys scutata	33.868
SK4H6e.01	Hojerup	Stichomicropora	Echinoid fragment	17.62
SK4H6g.02	Hojerup	Stichomicropora	Echinoid fragment	3.66
SK6H1.02	Hojerup	Stichomicropora	Galerites	6.857
SK6H1.08	Hojerup	Stichomicropora	Galerites	9.42
SK6H2.01	Hojerup	Stichomicropora	Galerites	18.077
SK6H2.04	Hojerup	Stichomicropora	Galerites	37.78
SK6H3.01	Hojerup	Stichomicropora	Galerites	181.234
SK6H3.02	Hojerup	Stichomicropora	Galerites	33.643
SK6H3.03	Hojerup	Stichomicropora	Galerites	6.343
SK6H3.04	Hojerup	Stichomicropora	Galerites	108.627
SK6H3.09	Hojerup	Stichomicropora	Galerites	18.214
SK6H3.12	Hojerup	Stichomicropora	Galerites	26.991
SK6H3.13	Hojerup	Stichomicropora	Galerites	1.425
SK6H3.14	Hojerup	Stichomicropora	Galerites	4.978
SK6H5.02	Hojerup	Stichomicropora	Echinoid Fragment	5.621
SK6H7.01	Hojerup	Stichomicropora	Echinocorys fragment	6.487
SK6H8.02	Hojerup	Stichomicropora	Echinocorys fragment	0.57
SK6H12.01	Hojerup	Stichomicropora	Fragment unident.	3.034
SK6H13b.02	Hojerup	Stichomicropora	Echinocorys fragment	83.392
SK6H13b.04	Hojerup	Stichomicropora	Echinocorys fragment	48.488
SK6H16b.01	Hojerup	Stichomicropora	Echinocorys	30.613
SK6H16d.01	Hojerup	Stichomicropora	Echinocorys	6.36
SK6H16e.07	Hojerup	Stichomicropora	Echinocorys	31.937
SK6H16e.12	Hojerup	Stichomicropora	Echinocorys	22.952
SK6H16e.13	Hojerup	Stichomicropora	Echinocorys	15.478
SK6H22d.01	Hojerup	Stichomicropora	Echinocorys fragment	51.836
SK6H23a.02	Hojerup	Stichomicropora	Echinocorys fragment	1.257
SK6H23b.03	Hojerup	Stichomicropora	Echinocorys fragment	18.162
SK6H23b.05	Hojerup	Stichomicropora	Echinocorys fragment	188.816
SK6H23c.08	Hojerup	Stichomicropora	Echinocorys fragment	450.16
SK6H23h.02	Hojerup	Stichomicropora	Echinocorys fragment	123.217
SK3K2.4	Korsnaeb	Stichomicropora	Bivalve fragment	4.988
SK3K2.6	Korsnaeb	Stichomicropora	Bivalve fragment	17.597
SK3K2.11	Korsnaeb	Stichomicropora	Bivalve fragment	1.6
SK3K3.3	Korsnaeb	Stichomicropora	Pycnodonte	33.125
SK3K3.4	Korsnaeb	Stichomicropora	Pycnodonte	4.257
SK3K3.5	Korsnaeb	Stichomicropora	Pycnodonte	8.842
SK3K3.6	Korsnaeb	Stichomicropora	Pycnodonte	8.45
SK3K3.11	Korsnaeb	Stichomicropora	Pycnodonte	32.677
SK3K5.1	Korsnaeb	Stichomicropora	Bivalve fragment	4.183
SK3K6.1	Korsnaeb	Stichomicropora	Echinocorys fragment	4.902
SK3K6.2	Korsnaeb	Stichomicropora	Echinocorys fragment	3.422
SK3K6.7	Korsnaeb	Stichomicropora	Echinocorys fragment	32.68
SK3K6.9	Korsnaeb	Stichomicropora	Echinocorys fragment	12.536
SK3K9.2	Korsnaeb	Stichomicropora	Fragment unident.	65.065
SK4K3.6	Korsnaeb	Stichomicropora	Echinocorys fragment	8.844
SK4K5.8	Korsnaeb	Stichomicropora	Fragment unident.	2.123
SK4K6.3	Korsnaeb	Stichomicropora	Fragment unident.	0.905
SK4K6.5	Korsnaeb	Stichomicropora	Fragment unident.	7.503
SK4K8.1	Korsnaeb	Stichomicropora	Pycnodonte	20.505
SK4K8.2	Korsnaeb	Stichomicropora	Pycnodonte	1.417
SK4K8.3	Korsnaeb	Stichomicropora	Pycnodonte	31.256
SK4K8.6	Korsnaeb	Stichomicropora	Pycnodonte	2.283
SK4K8.7	Korsnaeb	Stichomicropora	Pycnodonte	2.228
SK5K2.1	Korsnaeb	Stichomicropora	Echinocoyrs scutata	2.497
SK5K2.11	Korsnaeb	Stichomicropora	Echinocoyrs scutata	21.252
SK5K2.12	Korsnaeb	Stichomicropora	Echinocoyrs scutata	2.867
SK5K2.13	Korsnaeb	Stichomicropora	Echinocoyrs scutata	4.89
SK5K2.14	Korsnaeb	Stichomicropora	Echinocoyrs scutata	23.123
SK5K2.18	Korsnaeb	Stichomicropora	Echinocoyrs scutata	12.134
SK5K2.19	Korsnaeb	Stichomicropora	Echinocoyrs scutata	62.25
SK6K1.4	Korsnaeb	Stichomicropora	Echinoid fragment	13.269
SK6K1.13	Korsnaeb	Stichomicropora	Echinoid fragment	12.317
SK6K3.4	Korsnaeb	Stichomicropora	Fragment unident.	6.933
SK6K6.17	Korsnaeb	Stichomicropora	Echinocorys scutata	34.269
SK6K6.19	Korsnaeb	Stichomicropora	Echinocorys scutata	51.9
SK6K7.3	Korsnaeb	Stichomicropora	Echinocorys scutata	6.057
SK6K20.14	Korsnaeb	Stichomicropora	Echinocoyrs scutata	43.448
SK6K20.17	Korsnaeb	Stichomicropora	Echinocoyrs scutata	40.024
