# Supplementary material for: The Lilliput Effect in Colonial Organisms: Cheilostome Bryozoans at the Cretaceous–Paleogene Mass Extinction
Source: PLoS One. 2014 Feb 5;9(2):e87048. doi: 10.1371/journal.pone.0087048 (PMC3914794; doi:10.1371/journal.pone.0087048)
Supplement: Table S2 — Zooid sizes for within-genus analysis. (XLS) [file pone.0087048.s002.xls]

## Sheet: S2 Zooid size
Specimen	Formation	Bryozoan taxon	Substrate	Zooid length (microns)										Zooid width (microns)
				1	2	3	4	5	6	7	8	9	10	1	2	3	4	5	6	7	8	9	10
pdt12660	Prairie Bluff Chalk	Balantiostoma nomas	Bivalve unident.	344.266	361.958	302.119	351.018	431.193	343.446	328.94	376.742	383.509	418.971	213.754	236.861	287.74	283.183	275.156	308.292	281.575	300.557	276.389	276.504
pdt13095	Prairie Bluff Chalk	Balantiostoma nomas	Bivalve unident.	343.599	316.287	329.724	355.546	324.277	395.598	371.072	391.5	369.392	318.116	198.115	198.263	230.412	230.249	288.765	248.577	274.219	200.025	227.499	199.83
pdt13097	Prairie Bluff Chalk	Balantiostoma nomas	Bivalve unident.	387.14	343.358	342.621	393.204	373.957	362.806	414.656	478.611	389.173	331.451	227.38	231.454	207.111	241.274	267.488	197.65	190.307	175.973	245.488	248.293
pdt13073	Prairie Bluff Chalk	Balantiostoma nomas	Bivalve unident.	336.6	348.71	370.27	346.862	327.62	351.78	310.867	332.248	392.184	352.04	253.13	214.952	258.602	213.997	315.456	268.07	286.359	253.416	282.451	286.192
pdt13079	Prairie Bluff Chalk	Balantiostoma nomas	Bivalve unident.	304.326	310.887	345.452	280.072	327.405	298.169	340.747	335.938	310.253	304.44	272.65	233.582	248.503	201.506	272.149	286.859	275.561	277.605	231.034	215.632
pdt13080	Prairie Bluff Chalk	Balantiostoma nomas	Bivalve unident.	342.864	291.162	329.271	334.609	343.611	285.191	321.56	326.873	338.481	339.18	262.446	267.257	300.966	239.138	266.904	280.108	254.744	264.289	288.336	299.605
pdt13086	Prairie Bluff Chalk	Balantiostoma nomas	Bivalve unident.	371.791	370.92	390.554	332.285	367.953	397.087	314.127	335.402	304.019	332.784	277.905	249.732	281.682	215.166	251.8	305.738	248.562	221.394	227.943	256.547
USNM63824A	Clayton Formation	Balantiostoma midwayanica	a	216.177	232.795	191.964	193.424	173.683	199.261	186.816	204.393	178.775	191.945	179.974	171.221	190.91	150.789	162.274	135.161	132.775	171.167	147.126	150.972
USNM63824B	Clayton Formation	Balantiostoma midwayanica	a	356.428	327.561	350.971	373.675	263.189	268.173	336.637	345.245	327.628	312.385	309.96	240.04	289.856	184.152	208.064	183.319	261.93	192.838	249.687	245.64
USNM63824C	Clayton Formation	Balantiostoma midwayanica	a	252.106	278.797	311.859	266.991	258.956	272.402	293.177	330.96	325.856	295.313	241.332	224.333	231.892	230.043	309.03	206.605	220.45	177.093	240.959	297.906
USNM63824D	Clayton Formation	Balantiostoma midwayanica	a	320.898	273.439	265.598	256.18	302.13	268.292	258.517	262.264	291.82	318.331	216.656	260.985	254.992	236.519	252.527	276.85	197.947	213.69	234.41	188.892
pdt12959	Clayton Formation	Balantiostoma midwayanica	Bivalve unident.	245.519	234.045	265.908	257.851	269.102	185.839	256.922	250.982	238.491	237.727	207.14	164.702	185.079	224.836	156.533	183.506	165.698	200.411	179.735	157.69
pdt12963	Clayton Formation	Balantiostoma midwayanica	Bivalve unident.	329.7	321.163	290.098	282.568	293.937	299.165	278.598	258.69	268.454	275.592	202.244	225.682	208.328	218.998	211.107	272.785	265.267	237	216.009	208.911
pdt12995	Clayton Formation	Balantiostoma midwayanica	Bivalve unident.	283.168	297.727	304.687	280.69	262.226	218.859	270.548	272.747	273.806	260.963	163.933	178.313	190.841	159.619	185.639	196.37	157.55	197.883	172.378	166.603
pdt12996	Clayton Formation	Balantiostoma midwayanica	Bivalve unident.	273.483	301.555	319.142	325.287	295.957	297.083	314.772	285.262	284.606	300.721	232.355	207.461	205.632	233.041	246.837	217.665	197.561	193.331	166.223	217.507
pdt12997	Clayton Formation	Balantiostoma midwayanica	Bivalve unident.	299.79	274.746	299.013	354.65	299.209	328.191	283.524	299.526	282.227	296.422	261.203	218.497	175.019	239.008	215.082	191.02	179.482	198.612	197.918	224.953
pdt12689	Prairie Bluff Chalk	Tricephalopora larwoodi	Bivalve unident.	346.857	386.884	343.734	329.014	312.872	350.393	345.874	383.51	360.121	357.124	167.458	189.402	180.596	149.378	111.028	156.981	148.132	113.412	127.737	138.162
pdt12691	Prairie Bluff Chalk	Tricephalopora larwoodi	Bivalve unident.	364.679	387.796	362.68	381.795	387.538	376.204	319.424	363.469	315.973	356.643	151.683	133.966	164.569	140.137	121.5	131.808	133.745	116.861	140.137	158.684
pdt12944	Prairie Bluff Chalk	Tricephalopora larwoodi	Bivalve unident.	420.421	392.573	516.82	436.864	439.753	413.604	445.346	461.407	432.78	440.422	204.011	210.567	223.597	166.084	200.51	178.397	191.062	228.587	190.745	187.255
pdt12949	Prairie Bluff Chalk	Tricephalopora larwoodi	Bivalve unident.	516.627	438.286	467.005	451.874	475.476	479.35	486.09	406.708	418.715	474.202	198.558	223.223	218.608	180.48	195.813	193.16	218.864	205.919	200.073	215.992
pdt12952	Prairie Bluff Chalk	Tricephalopora larwoodi	Bivalve unident.	437.816	470.411	439.999	421.873	441.916	435.038	432.275	447.603	482.083	458.871	203.519	205.725	186.401	219.667	217.529	183.316	190.174	150.777	192.82	179.957
pdt12955	Prairie Bluff Chalk	Tricephalopora larwoodi	Bivalve unident.	421.876	466.811	437.862	463.353	442.431	405.471	411.057	426.589	416.713	431.454	187.624	217.336	170.639	184.947	211.36	212.894	212.42	202.139	188.368	262.384
pdt13018	Prairie Bluff Chalk	Tricephalopora larwoodi	Bivalve unident.	674.002	588.829	533.553	562.814	540.69	537.4	551.752	557.746	518.177	603.061	229.918	214.823	227.515	243.088	239.458	244.557	265.467	279.703	217.97	210.098
pdt13023	Prairie Bluff Chalk	Tricephalopora larwoodi	Bivalve unident.	457.897	399.831	417.226	405.4	384.546	437.248	421.21	342.29	359.823	408.157	180.851	212.71	202.952	182.069	173.107	204.767	193.144	181.071	180.542	215.236
pdt13076	Prairie Bluff Chalk	Tricephalopora larwoodi	Bivalve unident.	481.849	508.57	508.486	447.237	510.347	508.077	514.896	466.54	461.068	467.832	220.485	222.898	205.948	235.847	232.33	198.057	171.571	192.892	209.118	179.018
pdt13077	Prairie Bluff Chalk	Tricephalopora larwoodi	Bivalve unident.	458.925	486.301	496.896	480.915	472.974	506.715	480.341	440.039	447.327	459.355	208.055	191.645	202.46	187.815	169.765	167.951	167.52	193.245	177.529	207.449
pdt13081	Prairie Bluff Chalk	Tricephalopora larwoodi	Bivalve unident.	495.164	465.226	494.388	471.046	512.194	483.166	506.358	460.546	472.178	480.236	211.358	211.883	225.43	177.066	191.144	266.208	226.303	213.3	242.727	236.033
USNM63816A	Clayton Formation	Tricephalopora levigatum	a	368.802	431.345	399.047	429.582	400.068	415.143	389.245	384.082	341.733	351.177	201.844	217.479	218.944	203.55	213.262	212.669	267.658	253.829	201.021	219.497
USNM63816C	Clayton Formation	Tricephalopora levigatum	a	357.998	392.708	338.23	338.555	443.411	441.273	345.302	356.778	386.369	371.208	167.652	180.064	156.788	193.743	200.234	194.794	183.327	164.973	208.976	145.83
pdt12967	Clayton Formation	Tricephalopora levigatum	Bivalve unident.	258.148	283.849	294.509	315.256	321.179	287.244	276.032	293.588	301.528	321.92	139.483	133.108	152.985	129.286	119.758	143.92	133.809	124.95	141.361	135.066
SK2H1.1	Holtug Kridtbrud	Pliophloea subcornuta	Galerites	482.225	476.482	516.425	542.667	557.054	459.442	500.152	461.709	446.187	410.952	265.884	276.195	274.822	253.716	251.583	308.4	323.784	272.536	336.924	276.966
SK1H8.1	Holtug Kridtbrud	Pliophloea subcornuta	Galerites	502.476	468.064	557.393	460.088	448.146	461.487	462.455	435.412	443.459	446.908	288.75	314.986	240.433	299.096	259.654	311.031	337.799	334.095	312.394	363.597
SK2H30.13	Holtug Kridtbrud	Pliophloea subcornuta	Echinocorys scutata	409.516	403.973	445.949	413.925	463.372	431.124	439.844	462.305	391.987	424.148	265.484	280.906	275.548	285.908	286.133	303.25	296.664	274.328	284.45	318.24
SK1H17.1	Holtug Kridtbrud	Pliophloea subcornuta	Galerites	429.744	460.276	463.816	475.494	412.699	428.511	421.791	422.799	429.931	480.667	251.718	237.949	270.058	262.163	312.94	280.304	292.596	256.287	268.039	289.436
SK1H13.2	Holtug Kridtbrud	Pliophloea subcornuta	Galerites	417.583	471.462	434.478	429.046	414.643	413.277	431.716	451.805	443.339	425.626	295.662	306.481	305.171	286.849	273.265	317.296	299.253	280.972	275.907	281.266
SK3K2.1	Korsnaeb Member	Pliophloea subcornuta	Bivalve fragment	453.669	484.61	469.629	474.662	464.02	487.361	418.086	431.836	491.601	465.659	275.339	250.089	306.38	318.491	310.193	295.354	258.158	287.55	311.257	290.288
SK4K7.2	Korsnaeb Member	Pliophloea subcornuta	Echinocorys fragment	419.647	452.727	448.683	413.159	426.06	444.34	375.839	416.219	434.76	418.973	305.894	304.615	335.856	291.947	251.144	308.459	288.228	309.336	267.874	312.268
SK3K2.5	Korsnaeb Member	Pliophloea subcornuta	Bivalve fragment	454.097	401.267	407.897	446.543	452.568	474.304	468.137	444.769	499.006	436.892	242.636	250.321	255.608	279.723	292.622	254.594	296.904	285.181	248.443	243.198
SK6K7.12	Korsnaeb Member	Pliophloea subcornuta	Echinocorys scutata	416.755	412.465	436.44	423.933	419.179	400.609	396.828	422.684	418.028	408.837	261.168	287.409	318.897	318.45	299.984	278.798	266.28	297.503	269.8	293.009
SK6K19.10	Korsnaeb Member	Pliophloea subcornuta	Echinocoyrs scutata	335.703	352.646	381.614	353.909	356.258	367.807	381.644	411.332	361.795	416.651	258.548	272.122	246.374	253.684	252.533	251.067	295.708	272.207	252.595	275.399
SK6K6.25	Korsnaeb Member	Pliophloea subcornuta	Echinocorys scutata	386.778	380.793	382.675	416.133	390.37	398.05	378.76	411.165	406.553	403.166	236.33	241.486	232.349	252.415	220.909	239.226	251.277	257.366	254.066	264.731
SK6K7.4	Korsnaeb Member	Pliophloea subcornuta	Echinocorys scutata	429.098	365.319	452.799	366.316	356.064	394.61	352.314	381.125	400.492	346.634	263.684	266.866	268.551	281.158	239.552	253.684	278.509	248.277	217.95	272.89
SK6K7.32	Korsnaeb Member	Pliophloea subcornuta	Echinocorys scutata	425.058	428.187	420.851	508.636	461.76	436.848	454.704	453.435	459.789	481.404	272.536	301.929	268.378	266.434	309.779	312.742	278.294	311.801	337.976	316.122
SK6K13.1	Korsnaeb Member	Pliophloea subcornuta	Echinocorys fragment	348.792	357.014	336.02	363.458	396.766	357.36	398.833	356.817	387.428	406.477	283.78	254.594	244.05	245.749	258.712	268.926	236.767	247.775	282.349	248.554
SK6K6.33	Korsnaeb Member	Pliophloea subcornuta	Echinocorys scutata	478.985	504.08	454.951	447.588	439.667	482.686	484.831	457.658	447.617	453.254	346.554	292.745	347.511	332.949	352.218	307.499	301.353	272.56	283.251	306.422
SK6K20.11	Korsnaeb Member	Pliophloea subcornuta	Echinocoyrs scutata	475.705	445.483	406.388	464.169	414.805	454.468	441.766	516.407	518.378	466.277	338.281	320.583	311.26	328.46	314.635	307.209	331.234	349.707	347.977	392.777
SK1H4.7	Holtug Kridtbrud	Stichomicropora	Echinocorys scutata	555.095	544.484	572.646	630.628	545.39	523.845	551.159	581.529	552.998	537.515	415.947	498.32	442.239	526.193	511.973	441.844	480.831	436.3	493.121	401.554
SK6H16e.12	Holtug Kridtbrud	Stichomicropora	Echinocorys fragment	477.313	494.47	483.595	499.161	481.015	502.464	508.543	466.701	512.657	477.861	420.505	404.757	371.628	418.619	395.935	403.16	425.729	382.482	380.444	504.454
SK6H3.4	Holtug Kridtbrud	Stichomicropora	Galerites	652.059	617.863	639.818	524.396	577.111	724.371	681.482	567.541	645.599	660.62	490.794	566.284	481.149	483.528	489.95	439.266	448.761	435.46	522.067	490.331
SK3K8.3	Korsnaeb Member	Stichomicropora	Pycnodonte	459.23	482.523	486.116	486.445	468.254	486.553	492.013	498.462	511.114	490.71	469.194	470.273	464.652	426.184	460.319	409.748	373.585	357.296	414.017	429.593
SK4K8.2	Korsnaeb Member	Stichomicropora	Pycnodonte	471.79	433.397	463.722	439.614	492.701	456.855	492.524	466.178	439.244	509.397	420.554	410.229	436.865	394.846	437.708	309.929	353.437	354.258	359.231	370.742
SK3K6.7	Korsnaeb Member	Stichomicropora	Echinocorys fragment	481.624	499.125	524.322	515.516	529.261	536.562	532.112	521.642	473.188	573.614	439.132	493.325	436.737	418.618	451.365	389.543	455.03	437.699	413.626	426.797
SK4K8.1	Korsnaeb Member	Stichomicropora	Pycnodonte	496.63	507.585	508.039	475.447	543.351	517.317	489.447	409.794	480.698	489.168	348.739	324.803	372.657	370.774	313.299	401.681	405.359	418.758	362.282	374.69
			a Substrate information not available
